# Supplementary material for: Analogous humoral antigen recognition between Monkeypox-infected and Smallpox-vaccinated individuals
Source: bioRxiv or medRxiv preprint supplement (doi:10.1101/2022.12.22.22283648), 2022-12-26
Supplement: Supplementary file [file media-1.pdf]

1 **Supplementary figures**

2

3

4

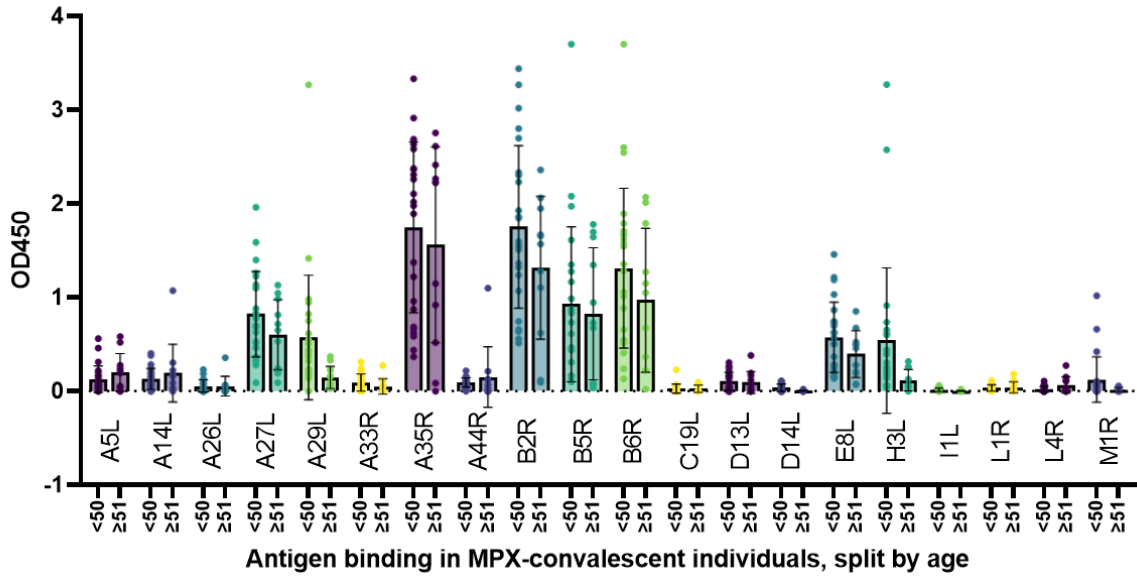

5

6

7

8

9

**Supplementary Figure 1:** Antigen binding in MPX individuals to different MPXV/VACV antigens, split according to age group (<50, >=51).

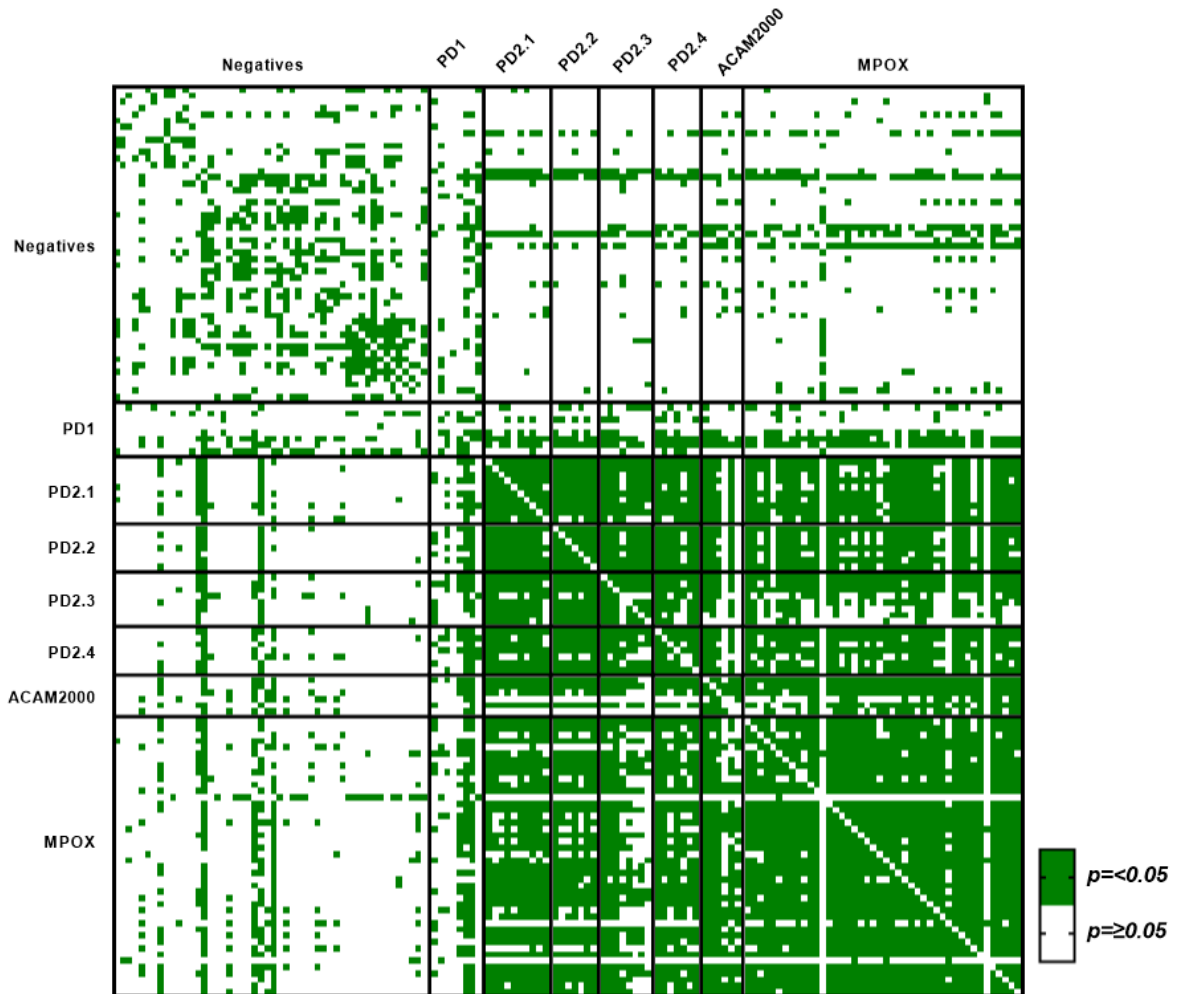

10  
 11 **Supplementary figure 2:** P-values of the Pearson correlation matrix. Green indicates a p  
 12 value of <0.05.

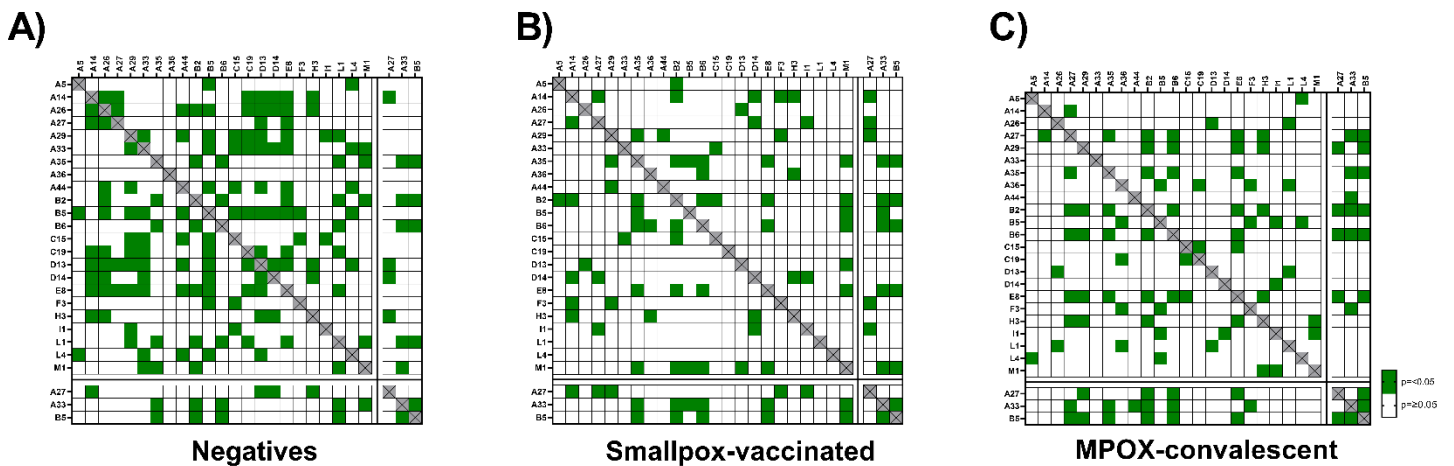

13  
 14 **Supplementary Figure 3:** P-values for MPXV/VACV antigens to one another in the different  
 15 cohorts (negative, Smallpox-vaccinated and MPOX-convalescent). Gree  
 16

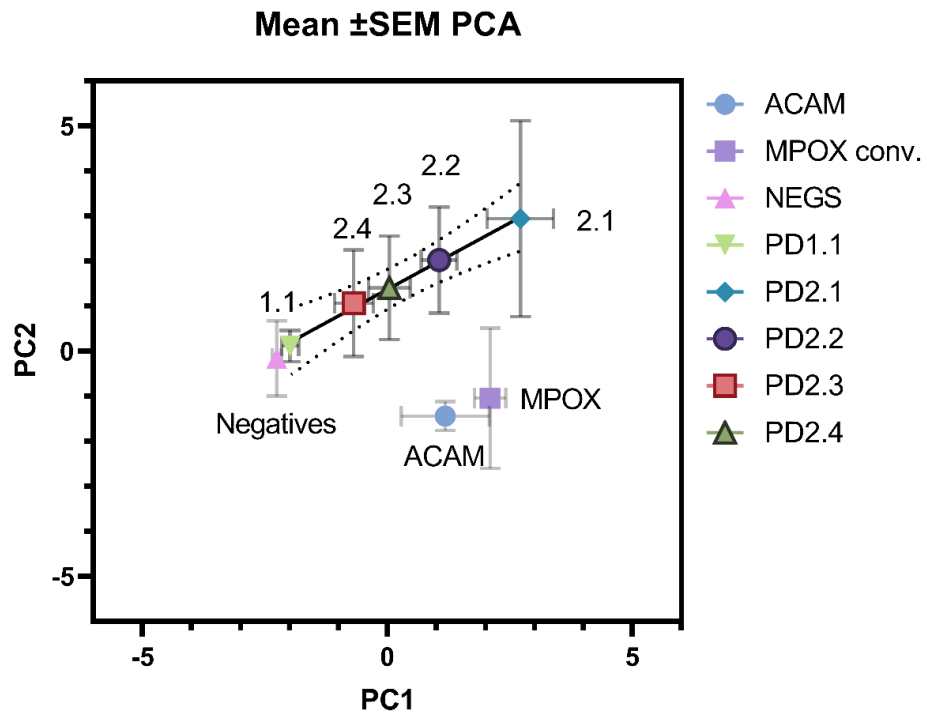

17  
 18 **Supplementary Figure 4:** Principal component analysis, with mean PCA  $\pm$  SEM for each  
 19 group. Simple linear regression (solid black line) was applied for all post-Imvanex vaccination  
 20 samples.  
 21

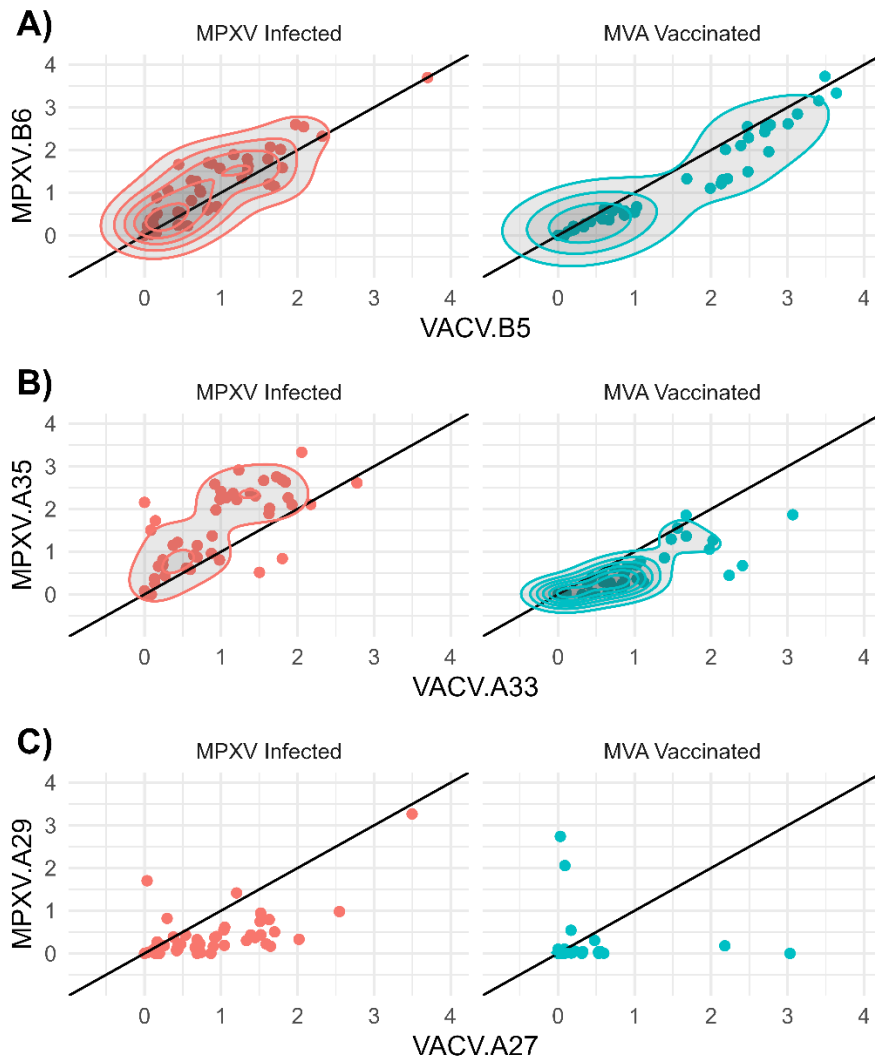

22  
23  
24  
25

**Supplementary figure 5:** Correlation of binding between MPXV and VACV protein homologues in MPXV-infected or MVA-vaccinated individuals.

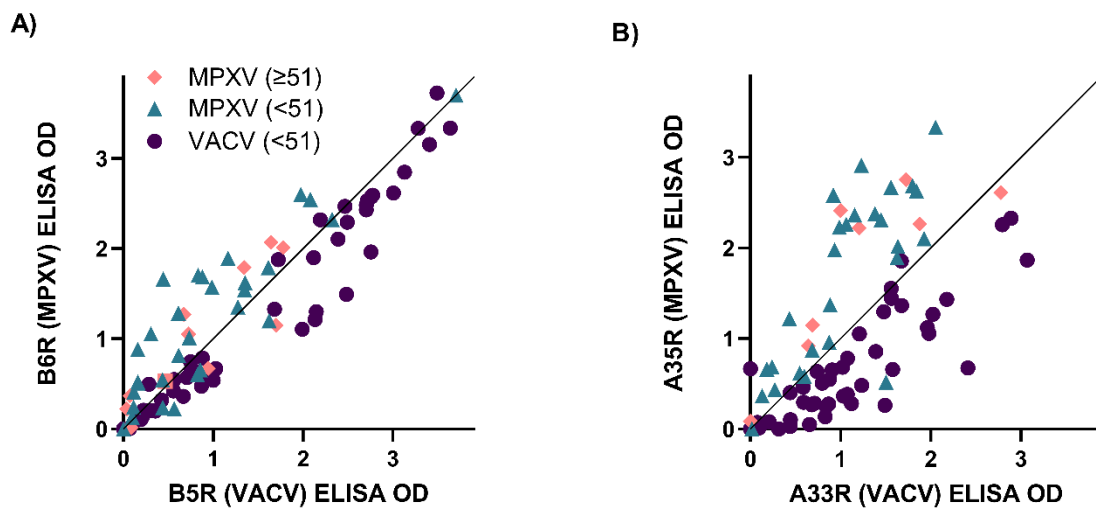

26  
27  
28  
29

**Supplementary figure 6:** Antibody binding in MPXV-infected individuals aged <51 or >=51 to homologous VACV and MPXV antigens.

30 **Supplementary tables**

31 **Supplementary table 1:** Antigens used in this study, the viral source, company, expression  
 32 host, expressed fragment and sequence provided by the manufacturer.

33

| MPXV/VACV Protein | Virus | Company                | Expression Vector              | Expressed Fragment | Sequence                                                                                                                                                                                                                                                                                                                                                     |
|-------------------|-------|------------------------|--------------------------------|--------------------|--------------------------------------------------------------------------------------------------------------------------------------------------------------------------------------------------------------------------------------------------------------------------------------------------------------------------------------------------------------|
| <b>A5</b>         | MPXV  | Native Antigen Company | E. coli                        | Total protein      | MDFFNKFSQG LAESSTPKSS<br>IYYSEEKDPD TKKDEAIEIG<br>LKSQESYYQR QLREQLARDN<br>MMTASRQPTQ PLQPTIHITP<br>QPVPPTTPAP ILLPSSTAPV<br>LKPRQQTNTS SDMSNLFDWL<br>STDTDAPAST LLPALTPSNT<br>VQDIISKFNK DQKMTTPPST<br>QPSQTLPTTT CTQQSDGSIS<br>CTTPTVTPLQ PPIVATVCTP<br>TPTGGTVCTT AQQNPNPGAA<br>SQQNLDDMTL KDLMSSVEKD<br>MRQLQAETND LVTNVYDARE<br>YTRRAIDQIL QLVKGFERFQ K |
| <b>A14</b>        | MPXV  | ProteoGenix            | E. coli                        | Asn24-Ala70        | -                                                                                                                                                                                                                                                                                                                                                            |
| <b>A26</b>        | MPXV  | ProteoGenix            | E. coli                        | Asp2-Glu75         | -                                                                                                                                                                                                                                                                                                                                                            |
| <b>A27</b>        | MPXV  | ProteoGenix            | E. coli                        | Leu428-Thr695      | -                                                                                                                                                                                                                                                                                                                                                            |
| <b>A27</b>        | VACV  | SinoBiological         | E. coli                        | Met1-Glu110        | -                                                                                                                                                                                                                                                                                                                                                            |
| <b>A29</b>        | MPXV  | ProteoGenix            | Mammalian cells                | Asp2-Glu110        | -                                                                                                                                                                                                                                                                                                                                                            |
| <b>A33</b>        | MPXV  | SinoBiological         | E. coli                        | -                  | -                                                                                                                                                                                                                                                                                                                                                            |
| <b>A33</b>        | VACV  | SinoBiological         | E. coli                        | Val57-Asn185       | -                                                                                                                                                                                                                                                                                                                                                            |
| <b>A35</b>        | MPXV  | SinoBiological         | Mammalian cells (HEK293 Cells) | -                  | -                                                                                                                                                                                                                                                                                                                                                            |
| <b>A36</b>        | MPXV  | ProteoGenix            | E. coli                        | Ile29-Lys168       | -                                                                                                                                                                                                                                                                                                                                                            |
| <b>A44</b>        | MPXV  | ProetoGenix            | E. coli                        | Asp2-Thr74         | -                                                                                                                                                                                                                                                                                                                                                            |
| <b>B2</b>         | MPXV  | Abbexa                 | Mammalian cells                | Ser19-Asp274       | SP QTSKKIGDDA<br>TISCSRNNTN YYVVMSAWYK<br>EPNSIILLAA KSDVLYFDNY<br>TKDKISYDSP YDDLVTITIT<br>KSLTAGDAGT YICAFFMTST<br>TNDTDKVDYE EYSIELIVNT<br>DSESTIDIIL SGSTPETISE<br>KPEDIDNSNC SSVFEIATPE<br>PITDNVEDHT DTVTYTSDSI<br>NTVNASSGES TTDETPPEIT<br>DKEEDHTVTD TVSYTTVSTS<br>SGIVTTKSTT DDADLYDTYN<br>DNDTVPPPTTV GGSTTSISNY<br>KTKD                           |
| <b>B5</b>         | MPXV  | ProteoGenix            | E. coli                        | Asn26-Thr371       | -                                                                                                                                                                                                                                                                                                                                                            |
| <b>B5</b>         | VACV  | SinoBiological         | Mammalian cells (HEK293 Cells) | Tyr18-His279       | -                                                                                                                                                                                                                                                                                                                                                            |
| <b>B6</b>         | MPXV  | ProteoGenix            | Mammalian cells                | Thr20-His279       | -                                                                                                                                                                                                                                                                                                                                                            |
| <b>C15</b>        | MPXV  | ProteoGenix            | Mammalian cells                | Met1-Pro176        | -                                                                                                                                                                                                                                                                                                                                                            |
| <b>C18</b>        | MPXV  | ProteoGenix            | E. coli                        | Met1-Leu635        | -                                                                                                                                                                                                                                                                                                                                                            |
| <b>C19</b>        | MPXV  | Abbexa                 | E. coli                        | Met1-Ile372        | MWPFASVPAG AKCRLVETLP<br>ENMDFRSDDL TTFECFNEII<br>TLAKKIYIYA SFCCNPLSTT<br>RGALIFDKLK EVSEKGIKII                                                                                                                                                                                                                                                             |

|            |      |                           |                                   |              |                                                                                                                                                                                                                                                                                                                                                                            |
|------------|------|---------------------------|-----------------------------------|--------------|----------------------------------------------------------------------------------------------------------------------------------------------------------------------------------------------------------------------------------------------------------------------------------------------------------------------------------------------------------------------------|
|            |      |                           |                                   |              | VLLDERGKRN LGELQSHSPD<br>INFITVNIDK KNNVGLLLGC<br>FWVSDDERCY<br>VGNASFTGGS IHTIKTLGVY<br>SDYPPLATDL RRRFDTFKAF<br>NSAKNSWLNL CSAACCLPVS<br>TAYHIKNPIG GVFFTDSPFH<br>LLGYSRDLDT DVVIDKLSA<br>KTSIDIEHLA IVPTTRVDGN<br>SYYWPDYNS IIEAAINRGV<br>KIRLLVGNWD KNDVYSMATA<br>RSLDALCVQN DLSVKVFTIQ<br>NNTKLLIVDD EYVHITSANF<br>DGTHYQNHGF VSFNSIDKQL<br>VSEAKKIFER DWVSSHSL<br>KI |
| <b>D13</b> | MPXV | ProteoGenix               | E. coli                           | Met1-Glu315  | -                                                                                                                                                                                                                                                                                                                                                                          |
| <b>D14</b> | MPXV | ProteoGenix               | Mammalian cells                   | Tyr20-Ala216 | -                                                                                                                                                                                                                                                                                                                                                                          |
| <b>E8</b>  | MPXV | ProteoGenix               | Mammalian cells                   | Pro2-Lys274  | -                                                                                                                                                                                                                                                                                                                                                                          |
| <b>F3</b>  | MPXV | ProteoGenix               | E. coli                           | Met1-Phe153  | -                                                                                                                                                                                                                                                                                                                                                                          |
| <b>H3</b>  | MPXV | SinoBiological            | Mammalian cells<br>(HEK293 Cells) | -            | -                                                                                                                                                                                                                                                                                                                                                                          |
| <b>I1</b>  | MPXV | SinoBiological            | E. coli                           | -            | -                                                                                                                                                                                                                                                                                                                                                                          |
| <b>L1</b>  | MPXV | ProteoGenix               | E. coli                           | Met1-Gln152  | -                                                                                                                                                                                                                                                                                                                                                                          |
| <b>L4</b>  | MPXV | Native Antigen<br>Company | E. coli                           | -            | MSLLENLIE EDTIFFAGSI<br>SEYDDLQPMVI AGAKSKFPRS<br>MLSIFNIVPR TMSKYELELI<br>HNENITGAMF TTMYNIRNNL<br>GLGDDKLTIE AIENYFLDPN<br>NEVMPLIINN TDMTTVIPKK<br>SGRRKNKNMV IFRQGSSPIL<br>CIFETRKKIN IYKENMESVS<br>TEYTPIGDNK ALISKYAGIN<br>ILNVYSPSTS MRLNAIYGFT<br>NKNKLEKLST NKELESYSSS<br>PLQEPRLND FLGLLECVKK<br>NIPLTDIPTK D                                                    |
| <b>M1</b>  | MPXV | SinoBiological            | Mammalian cells<br>(HEK293 Cells) | -            | -                                                                                                                                                                                                                                                                                                                                                                          |

34

35
